# Supplementary material
Source: PubMed Central journal article supplement (PMC5404967)
Supplement: NIHMS857441-supplement-Supplementary_Table_I.pdf [file NIHMS857441-supplement-Supplementary_Table_I.pdf]

## SUPPLEMENTAL MATERIAL

Supplementary Table I. Summary of recommendations for stroke caregiver and dyad interventions.<sup>1</sup>

1. **Target of interventions.** “Stroke caregiver interventions are probably recommended” over dyad interventions for caregiver outcomes; vice versa for survivor outcomes.
2. **Types of interventions.** “Interventions that combine skill building (eg, problem solving, stress management, goal setting) with psycho-educational strategies should be chosen;” “Interventions that involve only psycho-education are not recommended;” “Interventions that consist of support only or a combination of psycho-education and support do not have sufficiently strong evidence.”
3. **Intervention delivery design.** “Interventions that are tailored or individualized on the basis of the needs of stroke caregivers should be chosen;” “Postdischarge assessments with tailored interventions based on changing needs should be performed;” “Individual approaches are probably recommended over group interventions.”
4. **Mode of delivery.** “Interventions that are delivered face to face and/or by telephone are recommended;” “Interventions delivered completely by telephone can be useful;” “Interventions delivered by the Web might be considered for those with computer access.”
5. **Frequency of sessions.** “Interventions consisting of 5 to 9 sessions are recommended;” Those “with a wide range of sessions” “are not as useful.”

**Supplementary Table II. Summary of 5 Articles Testing Family Caregiver Interventions.**

| Author(s)<br>(year)                  | Sample                                                          | Design                                  | Skill-<br>building                                                            | Psycho-<br>educa-<br>tion  | Support | Face-<br>to-<br>Face                    | Tele-<br>phone     | Web | Total<br># ses-<br>sions                | Survivor outcomes<br>(p<.05)              | Caregiver outcomes<br>(p<.05)                                                                                                                                                                                                                                     |
|--------------------------------------|-----------------------------------------------------------------|-----------------------------------------|-------------------------------------------------------------------------------|----------------------------|---------|-----------------------------------------|--------------------|-----|-----------------------------------------|-------------------------------------------|-------------------------------------------------------------------------------------------------------------------------------------------------------------------------------------------------------------------------------------------------------------------|
| Bakas et al.,<br>2015 <sup>2</sup>   | N=254<br>T 123<br>C 131                                         | RCT                                     | X<br>Problem<br>solving,<br>Stress<br>manage,<br>Asking<br>HP info,<br>skills | X<br>Assess<br>Tailored    |         |                                         | 9                  |     | 9                                       | Not applicable                            | Those with PHQ-9 $\geq$ 5:<br>Depressive symptoms<br>– 8, 24, 52wks<br>Life changes – 12wks<br>Total sample:<br>Unhealthy days –<br>8wks<br><b>NS findings:</b><br>Depressive symptoms<br>at 12wks, Life<br>changes 8,24,52 wks<br>Unhealthy days<br>12,24,52 wks |
| Cameron et<br>al., 2015 <sup>3</sup> | N=31<br>T <sub>staff</sub> =11<br>T <sub>self</sub> =10<br>U=10 | RCT                                     |                                                                               | X<br>Assess<br>Tailored    |         | 1 <sub>staff</sub><br>1 <sub>self</sub> | 6 <sub>staff</sub> |     | 7 <sub>staff</sub><br>1 <sub>self</sub> | Not applicable                            | From BL to 1,3,6 mo:<br>T <sub>staff</sub> improved<br>perceived support<br>T <sub>self</sub> group increased<br>mastery<br><b>NS findings:</b><br>Depressive<br>symptoms, positive<br>affect, social support<br>at 1,3,6 mo.                                     |
| Forster et al.,<br>2013 <sup>4</sup> | N=928<br>T=450<br>U=478                                         | RCT<br>Cluster<br>by unit               | X<br>Hands<br>on<br>training                                                  | X<br>Assess<br>Tailored    |         | ?                                       |                    |     | ?                                       | <b>NS findings:</b><br>ADLs at 6 or 12 mo | <b>NS findings:</b><br>Burden at 6 mo or 12                                                                                                                                                                                                                       |
| Hirsch et al.,<br>2014 <sup>5</sup>  | N=28<br>T=14<br>U=14                                            | Quasi<br>(not<br>willing in<br>control) | X<br>Hands<br>on<br>training                                                  | X<br>Info in 4<br>sessions |         | unlimit<br>ed                           |                    |     | unlimit<br>ed                           | <b>NS Findings:</b><br>Rehospitalization  | Depressive symptoms<br>at discharge (T2)<br><b>NS Findings:</b><br>Depressive symptoms<br>at BL (T1), and follow-<br>up 4wks post<br>discharge (T3).<br>Prostration<br>(discomfort) at T1,2,3<br>Burden at T1,2,3                                                 |

| Author(s)<br>(year)                   | Sample                | Design | Skill-<br>building      | Psycho-<br>educa-<br>tion                         | Support | Face-<br>to-<br>Face | Tele-<br>phone | Web | Total<br># ses-<br>sions | Survivor outcomes<br>(p<.05) | Caregiver outcomes<br>(p<.05)                                                                                                                                                                                                |
|---------------------------------------|-----------------------|--------|-------------------------|---------------------------------------------------|---------|----------------------|----------------|-----|--------------------------|------------------------------|------------------------------------------------------------------------------------------------------------------------------------------------------------------------------------------------------------------------------|
| Pfeiffer et al.,<br>2014 <sup>6</sup> | N=122<br>T=60<br>C=62 | RCT    | X<br>Problem<br>solving | X<br>Card sort<br>(part of<br>problem<br>solving) |         | 2                    | 18             |     | 20                       | Not applicable               | Depressive symptoms<br>at 3mo and 12mo<br>Physical complaints at<br>3 & 12 mo<br>Leisure time at 3mo<br><b>NS Findings:</b><br>Sense of competence<br>(mastery) 3&12mo,<br>Problem solving<br>3&12mo<br>Leisure Time at 12mo |

N = Number of subjects; T = Treatment Group; C = Control Group; U = Usual care; cg = caregiver; pt = patient; NS = Not significant.  
All listed outcomes indicate improvement unless listed under NS Findings.

Types of interventions include skill-building, psycho-educational, and support.<sup>1</sup>

“**Skill-building** – strategies that focus on **processes** that facilitate problem solving, goal setting, communicating with health care professionals, stress management, and hands on training in such skills as lifting and mobility techniques, assistance with activities of daily living, and communication tailored to the needs of the stroke patient.”<sup>1</sup>

“**Psycho-educational-** provision of **information** about (a) warning signs for stroke, lifestyle changes, and general resources, (b) managing survivor emotions and behaviors, (c) managing medications and personal care, (d) managing finances and transportation, and (e) managing one’s own emotions and health care needs.”<sup>1</sup>

“**Support** – engaging in **interactions with peers** for support and advice (e.g., support groups, online discussion forums).”<sup>1</sup>

Supplementary Table III. Summary of 5 Articles Testing Dyad Interventions.

| Author(s)<br>(year)                 | Sample                        | Design | Skill-<br>building      | Psycho-<br>educa-<br>tion | Support | Face-<br>to-<br>Face | Tele-<br>phone | Web | Total<br># ses-<br>sions | Survivor outcomes<br>(p<.05)                                                                                                                                                                                                                                                                                                                                                                                                                                                                                                                                                                                                                                                                                                | Caregiver outcomes<br>(p<.05)                                                                                                                                                                                                                                                                                                                                                                                                                                                                                                                                                                                                                                                 |
|-------------------------------------|-------------------------------|--------|-------------------------|---------------------------|---------|----------------------|----------------|-----|--------------------------|-----------------------------------------------------------------------------------------------------------------------------------------------------------------------------------------------------------------------------------------------------------------------------------------------------------------------------------------------------------------------------------------------------------------------------------------------------------------------------------------------------------------------------------------------------------------------------------------------------------------------------------------------------------------------------------------------------------------------------|-------------------------------------------------------------------------------------------------------------------------------------------------------------------------------------------------------------------------------------------------------------------------------------------------------------------------------------------------------------------------------------------------------------------------------------------------------------------------------------------------------------------------------------------------------------------------------------------------------------------------------------------------------------------------------|
| Bishop et al.,<br>2014 <sup>7</sup> | N=49<br>dyads<br>T=23<br>U=26 | RCT    | X<br>Problem<br>solving | X<br>Assess<br>Tailored   |         |                      | 13             |     | 13                       | Global family 6mo<br>Criticism of subj 3mo<br>Criticism by subj 3mo<br>Family functioning<br>(FAD subscales):<br>Problem solving 6mo<br>Communication 3,6mo<br>Roles 3,6mo<br>Affective<br>responsiveness 3,6mo<br>Affective involvement<br>6mo<br>Behavioral control<br>3,6mo<br>General functioning<br>6mo<br><b>NS findings:</b><br>Global health<br>utilization 3,6mo<br>Global family 3mo<br>Global functioning<br>3,6mo<br>Physician visits 3,6mo<br>Therapy hours 3,6mo<br>IADLs 3,6mo<br>FIM 3,6mo<br>Depressive symptoms<br>3,6mo<br>Rehospitalization<br>3,6mo<br>Criticism of subj 6mo<br>Criticism by subj 6mo<br>Family functioning<br>(FAD subscales):<br>Problem solving 3mo<br>Affective involvement<br>3mo | Global family 3&6mo<br>Global functioning<br>3mo<br>IADLs 3mo<br>Criticism of subj<br>3,6mo<br><b>SS+CG (dyad)</b><br>SS+CG Global health<br>utilization at 3mo<br>SS+CG Global family<br>3&6mo<br>SS+CG physical visits<br>3mo<br>Criticism of subj<br>3,6mo<br>Criticism by subj 3mo<br><b>NS findings (CG):</b><br>Global health<br>utilization 3,6mo<br>Global functioning<br>6mo<br>Physician visits 3,6<br>Therapy hours 3,6<br>IADLs 6mo<br>Depressive symptoms<br>3,6 mo<br>Criticism by subj<br>3,6mo<br><b>NS findings (dyad):</b><br>Global health<br>utilization 6mo<br>Global functioning<br>3,6mo<br>Physician visits 6mo<br>Therapy hours 3,6mo<br>IADLs 3,6mo |

| Author(s)<br>(year)                   | Sample                                                  | Design                                                               | Skill-<br>building     | Psycho-<br>educa-<br>tion                             | Support | Face-<br>to-<br>Face | Tele-<br>phone | Web | Total<br># ses-<br>sions | Survivor outcomes<br>(p<.05)                                                                                                                                                                                                             | Caregiver outcomes<br>(p<.05)                                                                                                                                     |
|---------------------------------------|---------------------------------------------------------|----------------------------------------------------------------------|------------------------|-------------------------------------------------------|---------|----------------------|----------------|-----|--------------------------|------------------------------------------------------------------------------------------------------------------------------------------------------------------------------------------------------------------------------------------|-------------------------------------------------------------------------------------------------------------------------------------------------------------------|
|                                       |                                                         |                                                                      |                        |                                                       |         |                      |                |     |                          | General functioning<br>3mo                                                                                                                                                                                                               | Depressive symptoms<br>3,6mo<br>Criticism by subj 6mo                                                                                                             |
| Chang et al.,<br>2015 <sup>8</sup>    | N=19<br>dyads<br>T=19                                   | Quasi<br>(single<br>group)                                           |                        | X<br>Group<br>and<br>Individual<br>Assess<br>Tailored |         | 12                   |                |     | 12                       | Perceived health<br>status pre-post<br>ADL pre-post<br>IADL pre-post<br><b>NS findings:</b><br>Cost of health<br>services                                                                                                                | Caregiving satisfaction<br>pre-post<br>Satisfaction of day<br>care service pre-post                                                                               |
| Fens et al.,<br>2014 <sup>9</sup>     | N=117 pt<br>T=62<br>U=55<br><br>N=74 cg<br>T=41<br>U=33 | Quasi<br>(non-<br>rando<br>m<br>regiona<br>l stroke<br>service<br>s) |                        | X<br>Assess<br>Tailored                               |         | 5                    |                |     | 5                        | Frenchay Activities<br>Index- T6,12,18<br>Depression – T12<br><b>NS findings:</b><br>Stroke Sickness<br>Impact (primary)-<br>T6,12,18<br>Barthel Index –<br>T6,12,18<br>Anxiety –T6,12,18<br>Depression -T6                              | Depression – T6<br><b>NS findings:</b><br>Life satisfaction<br>(primary) – T6,12,18<br>Anxiety – T6,12,18<br>Depression –T12,18<br>Caregiver Strain –<br>T6,12,18 |
| Kim et al.,<br>2013 <sup>10</sup>     | N=36<br>dyads<br>T=18<br>U=18                           | RCT                                                                  |                        | X<br>Assess<br>Tailored                               |         |                      |                | 9   | 9                        | Exercise 3mo<br>Salty food 3mo<br>Fruit and vegetable<br>3mo<br>Sense of control 3mo<br>Health motivation 3mo<br><b>NS findings:</b><br>Triglyceride 3mo<br>Cholesterol 3mo<br>Smoking 3mo<br>Alcohol 3mo<br>Medication adherence<br>3mo | Caregiver mastery<br>3mo<br><b>NS findings:</b>                                                                                                                   |
| Ostwald et<br>al., 2014 <sup>11</sup> | N=159<br>dyads<br>T=79<br>C=80                          | RCT                                                                  | X<br>Skill<br>training | X<br>Assess<br>Tailored                               |         | 16<br>(avera<br>ge)  |                |     | 16<br>(avera<br>ge)      | Health status – 6mo<br>Cognitive – 6mo<br><b>NS findings:</b><br>Health status – 12mo<br>Cognitive – 12mo                                                                                                                                | Health status 6mo<br>Family support 12mo<br>Acquiring social<br>support 12mo<br><b>NS Findings:</b>                                                               |

| Author(s)<br>(year) | Sample | Design | Skill-<br>building       | Psycho-<br>educa-<br>tion | Support | Face-<br>to-<br>Face | Tele-<br>phone | Web | Total<br># ses-<br>sions | Survivor outcomes<br>(p<.05)                                                                                                                                                                                             | Caregiver outcomes<br>(p<.05)                                                                                                                                                                                                                                                                                                                                                                                                                               |
|---------------------|--------|--------|--------------------------|---------------------------|---------|----------------------|----------------|-----|--------------------------|--------------------------------------------------------------------------------------------------------------------------------------------------------------------------------------------------------------------------|-------------------------------------------------------------------------------------------------------------------------------------------------------------------------------------------------------------------------------------------------------------------------------------------------------------------------------------------------------------------------------------------------------------------------------------------------------------|
|                     |        |        | Coping<br>strategie<br>s |                           |         |                      |                |     |                          | Depression – 6,12mo<br>Stress– 6,12mo<br>SIS Physical– 6,12mo<br>SIS Emotion– 6,12mo<br>SIS Memory– 6,12mo<br>SIS Communication–<br>6,12mo<br>SIS recovery– 6,12mo<br>FIM– 6,12mo<br>Motor – 6,12mo<br>Mutuality– 6,12mo | Health status 12mo<br>Family support 6mo<br>Social support 6mo<br>Depression – 6,12mo<br>Stress– 6,12mo<br>Burden– 6,12mo<br>Coping– 6,12mo<br>Reframing– 6,12mo<br>Spiritual support–<br>6,12mo<br>Appraisal– 6,12mo<br>MOS Social support–<br>6,12mo<br>Tangible– 6,12mo<br>Affectionate– 6,12mo<br>Social interaction–<br>6,12mo<br>Emotional/info<br>support– 6,12mo<br># Friends/Relatives<br>– 6,12mo<br>Mutuality– 6,12mo<br>Preparedness–<br>6,12mo |

N = Number of subjects; T = Treatment Group; C = Control Group; U = Usual care; cg = caregiver; pt = patient; NS = Not significant.  
All listed outcomes indicate improvement unless listed under NS Findings.

Types of interventions include skill-building, psycho-educational, and support.<sup>1</sup>

“**Skill-building** – strategies that focus on *processes* that facilitate problem solving, goal setting, communicating with health care professionals, stress management, and hands on training in such skills as lifting and mobility techniques, assistance with activities of daily living, and communication tailored to the needs of the stroke patient.”<sup>1</sup>

“**Psycho-educational-** provision of *information* about (a) warning signs for stroke, lifestyle changes, and general resources, (b) managing survivor emotions and behaviors, (c) managing medications and personal care, (d) managing finances and transportation, and (e) managing one’s own emotions and health care needs.”<sup>1</sup>

“**Support** – engaging in *interactions with peers* for support and advice (e.g., support groups, online discussion forums).”<sup>1</sup>

**Supplementary Table IV. Summary of survivor and caregiver outcomes.**

| <p><b>Do family caregiver and dyad interventions improve survivor outcomes?</b></p>                                                                                                                                                                                                                                                                                                                                                                                                                            | <p><b>Do family caregiver and dyad interventions improve caregiver outcomes?</b></p>                                                                                                                                                                                                                                                                                                                                                                                                                                                                                                                                                                                                         |
|----------------------------------------------------------------------------------------------------------------------------------------------------------------------------------------------------------------------------------------------------------------------------------------------------------------------------------------------------------------------------------------------------------------------------------------------------------------------------------------------------------------|----------------------------------------------------------------------------------------------------------------------------------------------------------------------------------------------------------------------------------------------------------------------------------------------------------------------------------------------------------------------------------------------------------------------------------------------------------------------------------------------------------------------------------------------------------------------------------------------------------------------------------------------------------------------------------------------|
| <p><b>Survivor physical functioning.</b><br/>Two dyad studies<sup>8,9</sup> indicated that activities of daily living (ADL) and instrumental activities of daily living (IADL) were significantly improved for stroke survivors at the end of 12 and 18 months respectively. Another dyad study<sup>11</sup> reported rapid improvement in functional independence in the first 6 months, with significant improvement in cognitive ability in the intervention group.</p>                                     | <p><b>Caregiver preparedness.</b><br/>Compared with standard care, two studies reported significant improvements in caregiver mastery at 1, 3, and 6 months post-stroke.<sup>3,10</sup> Other studies reported nonsignificant results with respect to problem-solving,<sup>6</sup> mastery,<sup>6</sup> and preparedness.<sup>11</sup></p> <p><b>Caregiver burden, stress, and strain.</b><br/>Four interventions reviewed here targeted caregiver burden or strain as an explicit outcome,<sup>4,5,9,11</sup> but none showed significant effects.</p>                                                                                                                                      |
| <p><b>Survivor anxiety and depression.</b><br/>One dyad study<sup>9</sup> found a significant reduction in survivor depression at 12 months compared with usual care, although no improvement in anxiety levels at 6, 12, or 18 months. In another dyad study,<sup>11</sup> depression in the intervention versus the control group did not achieve significance at 6 or 12 months.</p>                                                                                                                        | <p><b>Caregiver anxiety and depressive symptoms.</b> Compared with a control group or usual care, four studies<sup>2,5,6,9</sup> showed significant improvements in depressive symptoms at various timepoints, with two studies sustaining these improvements up to a year.<sup>2,6</sup> One of the studies reported these findings only in a subgroup of caregivers with mild to severe depressive symptoms.<sup>2</sup> Other studies revealed nonsignificant results with respect to depressive symptoms,<sup>3,7,11</sup> possibly due to low baseline depressive symptom scores. Only one study<sup>9</sup> assessed caregiver anxiety, but did not find significant improvements.</p> |
| <p><b>Survivor health-related quality of life.</b><br/>Two dyad studies measured perceived health using a single item,<sup>8,11</sup> with one reporting improvement in survivor health within the intervention group over 12 weeks,<sup>8</sup> and the other showing significant improvement in survivor health compared with a control group at 6 months.<sup>11</sup> Kim and colleagues<sup>10</sup> revealed that, compared with a control group at 3 months, there were significant improvements in</p> | <p><b>Caregiver health-related quality of life.</b> Several studies showed improvements in caregiver health-related quality of life.<sup>2,6,11</sup> Unhealthy days,<sup>2</sup> health status,<sup>11</sup> and life changes<sup>2</sup> improved in some studies, with a reduction in physical complaints found in another study.<sup>6</sup> One study reported no significant group differences for life satisfaction.<sup>9</sup></p>                                                                                                                                                                                                                                                  |

|                                                                                                                                                                                                                                                                                                                                                                                                                                                                                                                                                                            |                                                                                                                                                                                                                                                                                                                                                                                                                                                                                                                                                                                             |
|----------------------------------------------------------------------------------------------------------------------------------------------------------------------------------------------------------------------------------------------------------------------------------------------------------------------------------------------------------------------------------------------------------------------------------------------------------------------------------------------------------------------------------------------------------------------------|---------------------------------------------------------------------------------------------------------------------------------------------------------------------------------------------------------------------------------------------------------------------------------------------------------------------------------------------------------------------------------------------------------------------------------------------------------------------------------------------------------------------------------------------------------------------------------------------|
| <p>health behaviors such as exercise, avoidance of salty foods, and increased fruit and vegetable consumption.<sup>10</sup></p>                                                                                                                                                                                                                                                                                                                                                                                                                                            |                                                                                                                                                                                                                                                                                                                                                                                                                                                                                                                                                                                             |
| <p><b>Survivor social functioning.</b><br/>         Bishop and colleagues<sup>7</sup> evaluated a telephone intervention with dyads over 6 months. Compared with usual care, stroke survivors exhibited improvement in several aspects of family functioning at either 3 or 6 months, although not all outcomes were significant at all time points. Because of the large number of outcomes, findings were difficult to interpret. Findings do show promise for improving family functioning from the survivor's perspective.</p>                                         | <p><b>Caregiver social functioning.</b><br/>         Several interventions showed improvement in perceptions of family or other social support,<sup>3,7,11</sup> and increased leisure time during the early recovery period.<sup>6</sup> One study<sup>7</sup> reported reductions in caregivers' critical attitudes and behavior toward the survivor, but not reductions in caregivers' feelings of receiving criticism. Another study<sup>11</sup> reported nonsignificant findings regarding various social-relational outcomes, including survivor-caregiver relationship quality.</p> |
| <p><b>Survivor service use.</b><br/>         One dyad study explored service use (global health utilization, physician visits, therapy hours, rehospitalization) and found no significant group differences at 3 or 6 months.<sup>7</sup> Interestingly, when caregiver and survivor scores were summed, they did find decreased global health utilization at 3 months; although, individual caregiver utilization scores were not significant.<sup>7</sup> Another caregiver study found no significant group differences for survivor rehospitalization.<sup>5</sup></p> | <p><b>Caregiver knowledge and satisfaction.</b> Chang and colleagues<sup>8</sup> found significant improvements in caregiver knowledge and satisfaction with services (their primary outcomes) after 12 weeks of receiving the intervention; however, these findings should be interpreted with caution as no comparison group was used.</p>                                                                                                                                                                                                                                                |



## References

1. Bakas T, Clark PC, Kelly-Hayes M, King RB, Lutz BJ, Miller EL; American Heart Association Council on Cardiovascular and Stroke Nursing and the Stroke Council. Evidence for stroke family caregiver and dyad interventions: a statement for healthcare professionals from the American Heart Association and American Stroke Association. *Stroke*. 2014;45:2836–2852.
2. Bakas T, Austin JK, Habermann B, Jessup NM, McLennon SM, Mitchell PH, et al. Telephone Assessment and Skill-Building Kit for Stroke Caregivers: A randomized controlled clinical trial. *Stroke*. 2015;46:3478-3487.
3. Cameron JI, Maglie G, Green TL, Gignac MAM, Bayley M, Huijbregts M, et al. A feasibility and pilot randomized controlled trial of the “Timing it Right Stroke Family Support Program.” *Clinical Rehabilitation*. 2015;29:1129-1140.
4. Forster A, Dickerson J, Young J, Patel A, Kalra L, Nixon J, et al. A structured training programme for caregivers of inpatients after stroke (TRACS): a cluster randomised controlled trial and cost-effectiveness analysis. *Lancet*. 2013;382:2069-2076.
5. Hirsch O, Leyh J, Karch C, Ferlings R, Schafer D. Impact of a training program for caregivers of neurological patients on depression, prostration, and subjective burden. *Journal of Neuroscience Nursing*. 2014;46:97-105.
6. Pfeiffer K, Beische D, Hautzinger M, Berry JW, Wengert J, Hoffrichter R, et al. Telephone-based problem-solving intervention for family caregivers of stroke survivors: A randomized controlled trial. *Journal of Consulting and Clinical Psychology*. 2014;82:628-643.
7. Bishop D, Miller I, Weiner D, Guilmette T, Mukand J, Feldmann E, et al. Family intervention: Telephone tracking (FITT): A pilot stroke outcome study. *Top Stroke Rehabil*. 2014;21(Suppl I):S63-S74.
8. Chang AK, Park Y, Fritschi C, Kim MJ. A family involvement and patient-tailored health management program in elderly Korean stroke patients’ day care centers. *Rehabilitation Nursing*. 2015;40:179-187.
9. Fens M, van Heugten CM, Beusmans G, Metsemakers J, Kester A, Limburg M. Effect of a stroke-specific follow-up care model on the quality of life of stroke patients and caregivers: A controlled trial. *J Rehabil Med*. 2014;46:7-15.
10. Kim J, Lee S, Kim J. Effects of a web-based stroke education program on recurrence prevention behaviors among stroke patients: A pilot study. *Health Education Research*. 2013;28:488-501.
11. Ostwald SK, Godwin KM, Cron SG, Kelley CP, Hersch G, Davis S. Home-based psychoeducational and mailed information programs for stroke-caregiving dyads post-discharge: a randomized trial. *Disabil Rehabil*. 2014;36:55-62.
